# Supplementary material for: Affinity maturation generates pathogenic antibodies with dual reactivity to DNase1L3 and dsDNA in systemic lupus erythematosus
Source: PubMed Central journal article supplement (PMC10027674; doi:10.1038/s41467-023-37083-x), 2023-03-20
Supplement: 41467_2023_37083_MOESM1_ESM.pdf [file 41467_2023_37083_MOESM1_ESM.pdf]

Supplementary Materials for:

**Affinity maturation generates pathogenic antibodies with dual reactivity to DNase1L3 and dsDNA in systemic lupus erythematosus.**

Eduardo Gomez-Bañuelos, Yikai Yu, Jessica Li, Kevin S. Cashman, Merlin Paz, Maria Isabel Trejo-Zambrano, Regina Bugrovsky, Youliang Wang, Asiya Seema Chida, Cheryl Sherman-Baust, Dylan P. Ferris, Daniel W. Goldman, Erika Darrach, Michelle Petri, Iñaki Sanz, Felipe Andrade

**This file contains:**

Supplementary Figs. S1 to S2  
Supplementary Tables S1 to S15

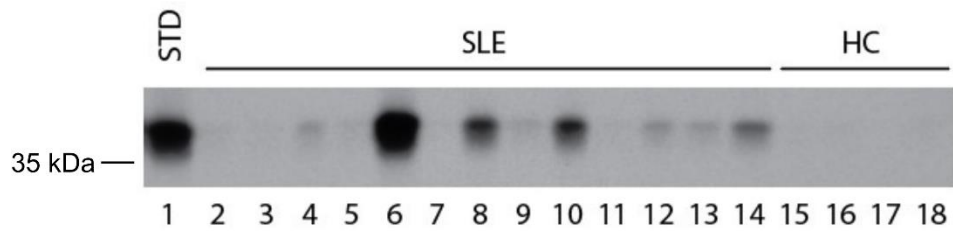

**Supplementary Fig. 1. Detection of anti-DNase1L3 antibodies in sera from the SPARE cohort and healthy controls.** Sera from the SPARE cohort and healthy controls (HC) were used to immunoprecipitate radiolabeled DNase1L3. Anti-DNase1L3 units were calculated by densitometry and the values were normalized to a high-titer anti-DNase1L3 serum (standard, STD). Shown is a representative radiograph including the STD, 13 SPARE, and 4 HC sera.

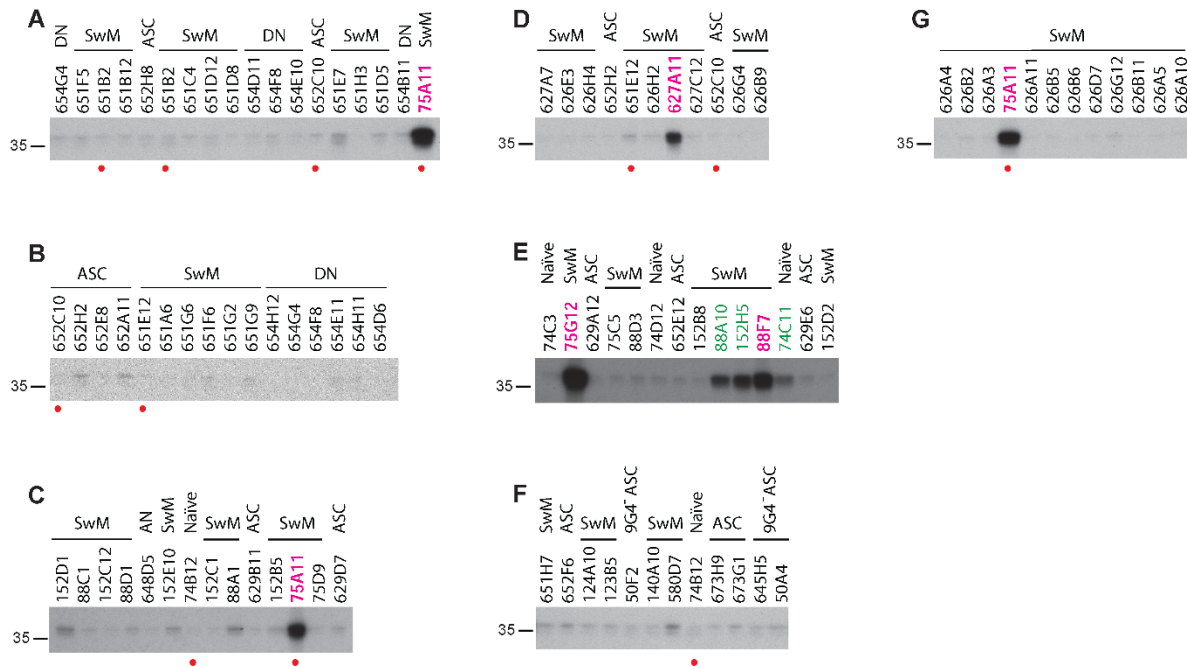

**Supplementary Fig. 2. Identification of SLE patient-derived monoclonal antibodies to DNase1L3. (A-G).** Supernatants from 293 cells expressing monoclonal antibodies generated from single B cells and antibody-secreting cells (ASCs) from SLE patients experiencing flares were screened by immunoprecipitation using radiolabeled DNase1L3. Among seven antibodies with reactivity to DNase1L3, three antibodies (panel E, marked in green) were not verified using affinity purified antibodies. Antibodies with confirmed reactivity to DNase1L3 are marked in pink. Antibodies marked with a red dot were unintentionally screened more than once. Except for clones 50F2, 645H5 and 50A4 (panel F), the rest of monoclonal antibodies are from 9G4<sup>+</sup> cells. SwM, switched memory. DN, double negative.

**Supplementary Table 1.** Demographics and clinical characteristics of patients by anti-DNase1L3 antibody status

|                                        | Anti-DNase1L3<br>Positive<br>n = 48 (100%) | Anti-DNase1L3<br>Negative<br>n = 110 (100%) | OR (95% CI)      | P value  |
|----------------------------------------|--------------------------------------------|---------------------------------------------|------------------|----------|
| <b>Demographic characteristics</b>     |                                            |                                             |                  |          |
| Female                                 | 47 (97.9%)                                 | 102 (92.7%)                                 | 3.7 (0.45,30.32) | 0.278    |
| Ethnicity                              |                                            |                                             |                  | 0.669    |
| Black                                  | 18 (37.5%)                                 | 45 (40.9%)                                  | 0.9 (0.45,1.91)  |          |
| White                                  | 25 (52.1%)                                 | 58 (52.7%)                                  | 1                |          |
| Other                                  | 5 (10.4%)                                  | 7 (6.4%)                                    | 1.7 (0.48,5.73)  |          |
| Ever Smoker, n (%)                     | 19 (39.6%)                                 | 42 (38.2%)                                  | 1.1 (0.53,2.12)  | 0.861    |
| Alcohol abuse                          | 3 (6.3%)                                   | 10 (9.1%)                                   | 0.7 (0.18,2.54)  | 0.756    |
| Drugs                                  | 2 (4.2%)                                   | 7 (6.4%)                                    | 0.6 (1.13,3.20)  | 0.724    |
| <b>Clinical characteristics (Ever)</b> |                                            |                                             |                  |          |
| Livedo                                 | 23 (47.9%)                                 | 33 (30%)                                    | 2.1 (1.06,4.35)  | 0.046    |
| Proteinuria                            | 29 (60.4%)                                 | 46 (41.8%)                                  | 2.1 (1.03,4.37)  | 0.038    |
| Mono multiplex                         | 2 (4.2%)                                   | 0 (0%)                                      | N/A              | 0.091    |
| Anemia                                 | 42 (87.5%)                                 | 75 (68.2%)                                  | 3.3 (1.27,8.51)  | 0.011    |
| Leukopenia                             | 27 (56.2%)                                 | 43 (39.1%)                                  | 2.0 (0.97,4.03)  | 0.056    |
| Lymphopenia                            | 26 (54.2%)                                 | 42 (38.2%)                                  | 1.9 (0.92,3.82)  | 0.081    |
| Cataracts                              | 11 (22.9%)                                 | 48 (43.6%)                                  | 0.4 (0.17,0.83)  | 0.020    |
| Other arterial thrombosis              | 5 (10.4%)                                  | 3 (2.8%)                                    | 4.1 (0.95,20.31) | 0.058    |
| Herpes zoster                          | 17 (35.4%)                                 | 23 (20.9%)                                  | 2.1 (0.97,4.63)  | 0.073    |
| Splenomegaly                           | 2 (4.2%)                                   | 0 (0%)                                      | N/A              | 0.091    |
| Cytotoxic use ever                     | 38 (79.2%)                                 | 61 (55.5%)                                  | 3.0 (1.37,6.92)  | 0.005    |
| Lupus anti-coagulant                   | 23 (47.9%)                                 | 31 (28.2%)                                  | 2.3 (1.15,4.81)  | 0.019    |
| Anti-cardiolipin                       | 39 (81.2%)                                 | 65 (59.1%)                                  | 3.0 (1.3,7.05)   | 0.010    |
| Anti-B2 Glycoprotein                   | 22 (45.8%)                                 | 27 (25%)                                    | 2.5 (1.21,5.35)  | 0.015    |
| Anti-Sm                                | 11 (22.9%)                                 | 21 (19.1%)                                  | 1.3 (0.51,2.92)  | 0.668    |
| FP-RPR                                 | 7 (14.6%)                                  | 11 (10%)                                    | 1.5 (0.49,4.37)  | 0.423    |
| ANA                                    | 48 (100%)                                  | 109 (99.1%)                                 | N/A              | 1.000    |
| Anti-dsDNA                             | 41 (85.4%)                                 | 58 (52.7%)                                  | 5.2 (2.09,13.54) | 0.0001   |
| Anti-Ro                                | 22 (45.8%)                                 | 27 (24.5%)                                  | 2.6 (1.24,5.48)  | 0.009    |
| Anti-La                                | 9 (18.8%)                                  | 15 (13.6%)                                  | 1.5 (0.54,3.69)  | 0.471    |
| Anti-RNP                               | 18 (37.5%)                                 | 24 (21.8%)                                  | 2.1 (0.99,4.71)  | 0.051    |
| Low CH50                               | 15 (31.2%)                                 | 8 (7.3%)                                    | 5.7 (2.17,14.85) | 0.0003   |
| Low C3                                 | 39 (81.2%)                                 | 48 (43.6%)                                  | 5.5 (2.44,13.11) | < 0.0001 |
| Low C4                                 | 33 (68.8%)                                 | 39 (35.5%)                                  | 4.0 (1.85,8.46)  | 0.0001   |
| Low complement C3/C4                   | 39 (81.2%)                                 | 56 (50.9%)                                  | 4.1 (1.82,9.77)  | 0.0004   |
| Coombs                                 | 12 (25%)                                   | 13 (11.8%)                                  | 2.5 (0.96,6.24)  | 0.056    |
| Elevated ESR                           | 37 (77.1%)                                 | 82 (74.5%)                                  | 1.2 (0.49,2.73)  | 0.842    |
| <b>At time of visit</b>                |                                            |                                             |                  |          |
| SELENA-SLEDAI, median (IQR)            | 2.5 (2,4)                                  | 1 (0,2)                                     | NA               | <0.0001  |
| PGA, median (IQR)                      | 0.5 (0,1)                                  | 0.5 (0, 0.5)                                | NA               | 0.537    |
| C3, mean (SD)                          | 110.02 (36.95)                             | 135.63 (35.75)                              | NA               | 0.0001   |
| C4, median (IQR)                       | 18 (12, 27)                                | 24.5 (20, 32)                               | NA               | 0.0003   |
| Anti-dsDNA, median (IQR)               | 10 (0, 80)                                 | 0 (0,0)                                     | NA               | <0.0001  |
| <b>SLEDAI (At time of visit)</b>       |                                            |                                             |                  |          |
| CNS                                    | 0(0%)                                      | 1 (0.9%)                                    | NA               | 1.000    |
| Vascular                               | 1 (2.2%)                                   | 2 (1.9%)                                    | 1.2 (0.10,12.98) | 1.000    |
| Renal                                  | 3 (6.5%)                                   | 5 (4.7%)                                    | 1.4 (0.32,6.11)  | 0.698    |
| Musculoskeletal                        | 4 (8.7%)                                   | 5 (4.7%)                                    | 1.9 (0.49,7.45)  | 0.454    |
| Immunological                          | 27 (58.7%)                                 | 16 (15.0%)                                  | 7.6 (3.47,16.45) | <0.0001  |
| Skin                                   | 17 (37.0%)                                 | 32 (29.9%)                                  | 1.3 (0.65,2.75)  | 0.451    |
| Serositis                              | 1 (2.2%)                                   | 2 (1.9%)                                    | 1.2 (0.10,13.27) | 1.000    |
| Hematology                             | 2 (4.4%)                                   | 1 (0.9%)                                    | 4.7 (0.41,53.6)  | 0.215    |
| Constitutional                         | 0 (0%)                                     | 0 (0%)                                      | NA               | NA       |

OR: Odds ratio. CI: confidence interval. ESR: Erythrocyte sedimentation rate. SELENA-SLEDAI: Safety of Estrogens in Lupus National Assessment study-SLE disease activity index. PGA:

physician global assessment. CNS: central nervous system. Comparisons of categorical variables were done using a two-sided Fisher's exact test. Comparisons of continuous variables were done using a two-sided Student's T test.

**Supplementary Table 2.** Multivariate predictors of cytotoxic drugs and prednisone use 'at time of visit' in patients with SLE.

| Variable      | Cytotoxic drug use |                | Prednisone use    |                |
|---------------|--------------------|----------------|-------------------|----------------|
|               | OR (95% CI)        | <i>P</i> value | OR (95% CI)       | <i>P</i> value |
| Anti-DNase1L3 | 4.6 (2.16 – 9.89)  | <0.001         | 2.6 (1.23 – 5.42) | 0.013          |
| SLEDAI        | 1.1 (0.95 – 1.22)  | 0.263          | 1.1 (0.99 – 1.28) | 0.053          |

Odds ratios and 95% Confidence intervals (CI) were estimated using multivariate logistic regression, adjusted for anti-DNase1L3 status and SLEDAI. *P* values are two-sided.

**Supplementary Table 3.** Differentially active modules in anti-DNase1L3 positive SLE patients vs. healthy controls.

| Module   | Description               | logFC | Average Expr | t     | Adjusted P. Value | B     |
|----------|---------------------------|-------|--------------|-------|-------------------|-------|
| DC.M1.2  | Interferon                | 7.95  | 1.77         | 6.40  | 5.73E-08          | 11.51 |
| DC.M3.4  | Interferon                | 5.64  | 3.81         | 7.15  | 1.84E-09          | 15.49 |
| DC.M5.12 | Interferon                | 3.36  | 6.17         | 6.78  | 9.82E-09          | 13.48 |
| DC.M7.16 | Myeloid lineage           | 2.42  | 2.84         | 5.96  | 4.40E-07          | 9.34  |
| DC.M5.15 | Myeloid lineage           | 1.76  | -2.59        | 2.56  | 0.035719236       | -3.42 |
| DC.M7.21 | Other/Undetermined        | 1.48  | 1.84         | 5.37  | 4.98E-06          | 6.57  |
| DC.M7.15 | Myeloid lineage           | 1.46  | 5.06         | 3.27  | 0.008448325       | -1.49 |
| DC.M6.3  | RNA metabolism/processing | 1.41  | 5.84         | 3.72  | 0.002339732       | -0.03 |
| DC.M7.10 | Myeloid lineage           | 1.24  | 1.81         | 2.52  | 0.039416595       | -3.53 |
| DC.M8.48 | RNA metabolism/processing | 1.22  | 1.09         | 5.53  | 3.17E-06          | 7.27  |
| DC.M8.60 | Myeloid lineage           | 1.14  | 1.76         | 4.62  | 8.87E-05          | 3.32  |
| DC.M7.2  | Other/Undetermined        | 1.13  | 3.91         | 3.23  | 0.009064687       | -1.60 |
| DC.M8.18 | Inflammation              | 1.07  | -2.34        | 3.18  | 0.010174195       | -1.76 |
| DC.M7.34 | Lymphoid lineage          | 1.07  | 3.84         | 5.16  | 1.09E-05          | 5.61  |
| DC.M7.29 | Myeloid lineage           | 0.98  | 1.24         | 3.38  | 0.006052795       | -1.14 |
| DC.M9.22 | Other/Undetermined        | 0.97  | 1.70         | 3.01  | 0.014643216       | -2.24 |
| DC.M5.2  | Inflammation              | 0.93  | 4.47         | 3.12  | 0.011597499       | -1.94 |
| DC.M9.24 | Interferon                | 0.87  | 1.18         | 3.45  | 0.004913589       | -0.91 |
| DC.M8.2  | Other/Undetermined        | 0.85  | 4.80         | 4.78  | 5.02E-05          | 3.98  |
| DC.M8.69 | Other/Undetermined        | 0.83  | 1.39         | 4.61  | 8.87E-05          | 3.30  |
| DC.M9.29 | Apoptosis                 | 0.74  | 0.71         | 2.51  | 0.039481302       | -3.54 |
| DC.M9.1  | RNA metabolism/processing | 0.66  | -2.64        | 4.81  | 4.77E-05          | 4.11  |
| DC.M9.7  | Other/Undetermined        | 0.42  | -1.79        | 2.61  | 0.032740512       | -3.31 |
| DC.M8.43 | Other/Undetermined        | -0.33 | 2.98         | -2.88 | 0.018640992       | -2.60 |
| DC.M9.37 | Other/Undetermined        | -0.36 | 1.85         | -2.67 | 0.029076506       | -3.15 |
| DC.M9.13 | Other/Undetermined        | -0.38 | -1.31        | -2.63 | 0.031774271       | -3.25 |
| DC.M9.18 | Other/Undetermined        | -0.43 | 1.55         | -2.91 | 0.017952989       | -2.52 |
| DC.M9.12 | Other/Undetermined        | -0.47 | 0.68         | -2.57 | 0.035271025       | -3.39 |
| DC.M7.8  | RNA metabolism/processing | -0.48 | 0.61         | -2.42 | 0.04988711        | -3.76 |
| DC.M4.3  | RNA metabolism/processing | -0.48 | 8.34         | -2.75 | 0.024250822       | -2.94 |
| DC.M8.6  | Other/Undetermined        | -0.50 | -0.74        | -2.78 | 0.023639798       | -2.86 |
| DC.M8.22 | Other/Undetermined        | -0.51 | -1.21        | -2.95 | 0.016718509       | -2.41 |
| DC.M2.1  | Other/Undetermined        | -0.54 | 1.65         | -3.13 | 0.011462212       | -1.90 |
| DC.M9.16 | Other/Undetermined        | -0.61 | -0.35        | -2.88 | 0.018640992       | -2.61 |
| DC.M9.23 | Other/Undetermined        | -0.65 | -1.65        | -3.91 | 0.00126441        | 0.62  |
| DC.M9.28 | Other/Undetermined        | -0.66 | -3.15        | -2.94 | 0.016999169       | -2.45 |
| DC.M8.32 | Lymphoid lineage          | -0.68 | 0.01         | -2.87 | 0.018819028       | -2.64 |
| DC.M4.8  | RNA metabolism/processing | -0.69 | 1.38         | -2.99 | 0.015141601       | -2.30 |
| DC.M8.5  | RNA metabolism/processing | -0.71 | -2.69        | -2.70 | 0.027437819       | -3.08 |
| DC.M8.44 | Other/Undetermined        | -0.73 | 1.74         | -2.75 | 0.024250822       | -2.95 |

|          |                           |       |       |       |             |       |
|----------|---------------------------|-------|-------|-------|-------------|-------|
| DC.M8.16 | Other/Undetermined        | -0.78 | -2.28 | -5.27 | 7.28E-06    | 6.09  |
| DC.M7.19 | RNA metabolism/processing | -0.84 | 0.43  | -2.77 | 0.023655249 | -2.88 |
| DC.M7.26 | Mitochondria              | -1.04 | 2.50  | -5.49 | 3.21E-06    | 7.11  |
| DC.M7.17 | Lymphoid lineage          | -1.10 | -1.03 | -3.59 | 0.003210095 | -0.48 |
| DC.M7.6  | RNA metabolism/processing | -1.18 | -5.64 | -3.64 | 0.002884011 | -0.29 |
| DC.M6.2  | Other/Undetermined        | -1.21 | 0.53  | -4.27 | 0.000321753 | 1.96  |
| DC.M7.12 | RNA metabolism/processing | -1.30 | -4.43 | -3.71 | 0.002339732 | -0.05 |
| DC.M5.6  | Mitochondria              | -1.36 | -2.68 | -2.63 | 0.031774271 | -3.27 |
| DC.M3.5  | Cell cycle                | -1.50 | -9.33 | -3.22 | 0.009064687 | -1.62 |
| DC.M7.13 | RNA metabolism/processing | -1.64 | -2.58 | -4.36 | 0.0002436   | 2.28  |
| DC.M6.4  | RNA metabolism/processing | -1.79 | 0.63  | -7.60 | 2.78E-10    | 17.98 |
| DC.M5.10 | Mitochondria              | -1.84 | -5.59 | -3.08 | 0.012265305 | -2.05 |
| DC.M3.6  | Lymphoid lineage          | -2.17 | -1.64 | -3.09 | 0.01213926  | -2.01 |
| DC.M5.5  | Lymphoid lineage          | -2.29 | 0.27  | -3.61 | 0.003126304 | -0.41 |



**Supplementary Table 4.** Differentially active modules in anti-DNase1L3 negative SLE patients vs. healthy controls.

| <b>Module</b> | <b>Description</b>        | <b>logFC</b> | <b>Average Expression</b> | <b>t</b> | <b>Adjusted P. value</b> | <b>B</b> |
|---------------|---------------------------|--------------|---------------------------|----------|--------------------------|----------|
| DC.M1.2       | Interferon                | 4.01         | 1.77                      | 3.52     | 0.009875473              | -0.57    |
| DC.M3.4       | Interferon                | 2.48         | 3.81                      | 3.42     | 0.012553444              | -0.89    |
| DC.M5.12      | Interferon                | 1.54         | 6.17                      | 3.38     | 0.013405332              | -1.04    |
| DC.M6.3       | RNA metabolism/processing | 1.05         | 5.84                      | 3.04     | 0.02751127               | -2.04    |
| DC.M8.48      | RNA metabolism/processing | 0.83         | 1.09                      | 4.09     | 0.00210667               | 1.39     |
| DC.M9.25      | Other/Undetermined        | 0.81         | 0.61                      | 3.83     | 0.003735567              | 0.46     |
| DC.M8.60      | Myeloid lineage           | 0.73         | 1.76                      | 3.21     | 0.019482586              | -1.53    |
| DC.M7.34      | Lymphoid lineage          | 0.73         | 3.84                      | 3.82     | 0.003735567              | 0.43     |
| DC.M9.1       | RNA metabolism/processing | 0.65         | -2.64                     | 5.16     | 5.37E-05                 | 5.69     |
| DC.M8.69      | Other/Undetermined        | 0.54         | 1.39                      | 3.30     | 0.015883252              | -1.27    |
| DC.M8.2       | Other/Undetermined        | 0.52         | 4.80                      | 3.19     | 0.019664361              | -1.60    |
| DC.M8.37      | Other/Undetermined        | -0.57        | 3.91                      | -3.03    | 0.02751127               | -2.07    |
| DC.M9.16      | Other/Undetermined        | -0.58        | -0.35                     | -3.02    | 0.02751127               | -2.08    |
| DC.M2.1       | Other/Undetermined        | -0.62        | 1.65                      | -3.95    | 0.003021229              | 0.89     |
| DC.M9.23      | Other/Undetermined        | -0.67        | -1.65                     | -4.43    | 0.000678785              | 2.66     |
| DC.M7.26      | Mitochondria              | -0.77        | 2.50                      | -4.43    | 0.000678785              | 2.66     |
| DC.M6.4       | RNA metabolism/processing | -1.40        | 0.63                      | -6.47    | 1.52E-07                 | 11.92    |

**Supplementary Table 5.** Differentially active modules on anti-DNase1L3 positive vs. negative patients with SLE.

| Module   | Description               | logF C | Average expression | t     | Adjusted P. value | B     |
|----------|---------------------------|--------|--------------------|-------|-------------------|-------|
| DC.M1.2  | Interferon                | 3.93   | 1.77               | 5.03  | 3.97E-05          | 5.12  |
| DC.M3.4  | Interferon                | 3.16   | 3.81               | 6.37  | 2.61E-07          | 11.40 |
| DC.M5.12 | Interferon                | 1.82   | 6.17               | 5.85  | 1.97E-06          | 8.82  |
| DC.M7.16 | Myeloid lineage           | 1.46   | 2.84               | 5.73  | 2.38E-06          | 8.26  |
| DC.M5.15 | Myeloid lineage           | 1.44   | -2.59              | 3.33  | 0.007846893       | -1.17 |
| DC.M4.2  | Inflammation              | 1.12   | 2.78               | 2.53  | 0.041085413       | -3.36 |
| DC.M6.6  | Apoptosis                 | 1.01   | 0.29               | 3.87  | 0.002011952       | 0.59  |
| DC.M6.13 | Apoptosis                 | 0.93   | 2.10               | 3.42  | 0.006968963       | -0.88 |
| DC.M7.21 | Other/Undetermined        | 0.90   | 1.84               | 5.22  | 2.09E-05          | 5.93  |
| DC.M7.10 | Myeloid lineage           | 0.85   | 1.81               | 2.73  | 0.029237076       | -2.86 |
| DC.M5.1  | Inflammation              | 0.81   | 12.22              | 2.43  | 0.04885988        | -3.58 |
| DC.M4.6  | Inflammation              | 0.77   | 10.61              | 2.72  | 0.029237076       | -2.88 |
| DC.M7.15 | Myeloid lineage           | 0.74   | 5.06               | 2.63  | 0.034895318       | -3.11 |
| DC.M5.2  | Inflammation              | 0.59   | 4.47               | 3.13  | 0.011960732       | -1.77 |
| DC.M9.24 | Interferon                | 0.56   | 1.18               | 3.52  | 0.00588123        | -0.56 |
| DC.M7.29 | Myeloid lineage           | 0.54   | 1.24               | 2.93  | 0.019305229       | -2.31 |
| DC.M8.60 | Myeloid lineage           | 0.41   | 1.76               | 2.65  | 0.034597115       | -3.05 |
| DC.M8.48 | RNA metabolism/processing | 0.39   | 1.09               | 2.81  | 0.024258362       | -2.64 |
| DC.M7.34 | Lymphoid lineage          | 0.34   | 3.84               | 2.62  | 0.034895318       | -3.12 |
| DC.M8.2  | Other/Undetermined        | 0.33   | 4.80               | 2.94  | 0.019305229       | -2.28 |
| DC.M8.69 | Other/Undetermined        | 0.28   | 1.39               | 2.52  | 0.041209835       | -3.38 |
| DC.M9.14 | Other/Undetermined        | 0.28   | -0.97              | 2.81  | 0.024258362       | -2.65 |
| DC.M9.13 | Other/Undetermined        | -0.24  | -1.31              | -2.60 | 0.035347589       | -3.18 |
| DC.M8.43 | Other/Undetermined        | -0.26  | 2.98               | -3.59 | 0.005061839       | -0.36 |
| DC.M2.2  | Cell cycle                | -0.29  | -1.41              | -3.27 | 0.009142776       | -1.35 |
| DC.M9.12 | Other/Undetermined        | -0.33  | 0.68               | -2.90 | 0.019907533       | -2.40 |
| DC.M8.54 | RNA metabolism/processing | -0.36  | 0.24               | -2.91 | 0.019907533       | -2.39 |
| DC.M8.6  | Other/Undetermined        | -0.37  | -0.74              | -3.24 | 0.009266393       | -1.43 |
| DC.M4.8  | RNA metabolism/processing | -0.38  | 1.38               | -2.60 | 0.035347589       | -3.19 |
| DC.M6.4  | RNA metabolism/processing | -0.39  | 0.63               | -2.64 | 0.034895318       | -3.08 |
| DC.M8.16 | Other/Undetermined        | -0.40  | -2.28              | -4.31 | 0.000621304       | 2.22  |
| DC.M8.14 | Other/Undetermined        | -0.46  | -0.97              | -3.46 | 0.006450071       | -0.76 |
| DC.M8.15 | Other/Undetermined        | -0.47  | -3.71              | -4.05 | 0.001384467       | 1.25  |
| DC.M6.2  | Other/Undetermined        | -0.49  | 0.53               | -2.73 | 0.029237076       | -2.86 |
| DC.M9.5  | Other/Undetermined        | -0.49  | -1.24              | -2.93 | 0.019305229       | -2.32 |
| DC.M7.6  | RNA metabolism/processing | -0.50  | -5.64              | -2.47 | 0.045082647       | -3.49 |
| DC.M8.8  | Apoptosis                 | -0.55  | -0.47              | -3.35 | 0.007665713       | -1.10 |
| DC.M7.20 | Lymphoid lineage          | -0.56  | -0.98              | -2.61 | 0.035347589       | -3.16 |
| DC.M8.32 | Lymphoid lineage          | -0.57  | 0.01               | -3.86 | 0.002011952       | 0.56  |

|          |                           |       |       |       |             |       |
|----------|---------------------------|-------|-------|-------|-------------|-------|
| DC.M9.2  | Myeloid lineage           | -0.58 | -5.14 | -4.21 | 0.000824286 | 1.84  |
| DC.M7.18 | Lymphoid lineage          | -0.58 | -2.07 | -2.85 | 0.022738635 | -2.54 |
| DC.M8.25 | Lymphoid lineage          | -0.67 | 1.55  | -3.20 | 0.010172074 | -1.55 |
| DC.M7.25 | Lymphoid lineage          | -0.67 | -4.58 | -3.01 | 0.016882333 | -2.11 |
| DC.M6.7  | Other/Undetermined        | -0.74 | -5.32 | -2.50 | 0.04280179  | -3.43 |
| DC.M5.8  | RNA metabolism/processing | -0.75 | -4.24 | -3.26 | 0.009142776 | -1.39 |
| DC.M7.17 | Lymphoid lineage          | -0.75 | -1.03 | -3.91 | 0.001956566 | 0.74  |
| DC.M5.11 | Lymphoid lineage          | -0.78 | 0.20  | -3.38 | 0.007656499 | -1.01 |
| DC.M7.5  | RNA metabolism/processing | -0.81 | -4.23 | -3.35 | 0.007665713 | -1.10 |
| DC.M7.12 | RNA metabolism/processing | -0.88 | -4.43 | -3.98 | 0.00162993  | 1.00  |
| DC.M7.13 | RNA metabolism/processing | -1.11 | -2.58 | -4.68 | 0.000154482 | 3.67  |
| DC.M4.10 | Lymphoid lineage          | -1.20 | -3.04 | -2.55 | 0.038815225 | -3.29 |
| DC.M4.7  | Cell cycle                | -1.32 | -3.74 | -3.17 | 0.010887101 | -1.65 |
| DC.M5.5  | Lymphoid lineage          | -1.40 | 0.27  | -3.49 | 0.006285316 | -0.68 |

**Supplementary Table 6.** Multivariable predictors of module M1.2 activity on SLE patients.

Dependent variable: Module M1.2

| Variable           | Model 1  |                | Model 2  |                |
|--------------------|----------|----------------|----------|----------------|
|                    | Estimate | <i>P</i> value | Estimate | <i>P</i> value |
| Anti-DNase1L3      | 2.951    | 0.002          | 2.746    | 0.002          |
| Anti-DNA           | 2.629    | 0.008          | 2.584    | 0.007          |
| Neutrophil count   | -0.002   | 0.313          |          |                |
| cSLEDAI            | 0.240    | 0.138          |          |                |
| Hydroxychloroquine | -2.64    | 0.006          | -2.521   | 0.008          |
| Immunosuppressors  | -0.007   | 0.993          |          |                |
| Prednisone use     | -0.647   | 0.444          |          |                |

Dependent variables were input as individual normalized enrichment scores (NES) calculated by ssGSEA. Neutrophil count represents the MCP score on arbitrary units. cSLEDAI, clinical SLEDAI score was calculated by subtraction of the increased-DNA binding and low complement score from the SELENA-SLEDAI score. Hydroxychloroquine, immunosuppressors, and prednisone use were entered as dummy variables coded as 0 when absent or 1 when present. Two-sided *P* values are shown.

**Supplementary Table 7.** Multivariable predictors of module M3.4 activity on SLE patients.

Dependent variable: Module M3.4

| Variable           | Model 1  |                | Model 2  |                |
|--------------------|----------|----------------|----------|----------------|
|                    | Estimate | <i>P</i> value | Estimate | <i>P</i> value |
| Anti-DNase1L3      | 2.424    | <0.001         | 2.295    | <0.001         |
| Anti-DNA           | 1.872    | 0.003          | 1.911    | 0.002          |
| Neutrophil count   | -0.0003  | 0.806          |          |                |
| cSLEDAI            | 0.203    | 0.046          |          |                |
| Hydroxychloroquine | -1.781   | 0.003          | -1.734   | 0.003          |
| Immunosuppressors  | -0.190   | 0.528          |          |                |
| Prednisone use     | -0.414   | 0.0433         |          |                |

Dependent variables were input as individual normalized enrichment scores (NES) calculated by ssGSEA. Neutrophil count represents the MCP score on arbitrary units. cSLEDAI, clinical SLEDAI score was calculated by subtraction of the increased-DNA binding and low complement score from the SELENA-SLEDAI score. Hydroxychloroquine, immunosuppressors, and prednisone use were entered as dummy variables coded as 0 when absent or 1 when present. Two-sided *P* values are shown.

**Supplementary Table 8.** Multivariable predictors of module M5.12 activity on SLE patients.

Dependent variable: Module M5.12

| Variable           | Model 1  |                | Model 2  |                |
|--------------------|----------|----------------|----------|----------------|
|                    | Estimate | <i>P</i> value | Estimate | <i>P</i> value |
| Anti-DNase1L3      | 1.145    | 0.001          | 1.104    | 0.001          |
| Anti-DNA           | 1.136    | 0.002          | 1.156    | 0.002          |
| Neutrophil count   | 0.003    | 0.0001         | 0.002    | 0.001          |
| cSLEDAI            | 0.082    | 0.178          |          |                |
| Hydroxychloroquine | -1.107   | 0.002          | -1.107   | 0.002          |
| Immunosuppressors  | -0.179   | 0.572          |          |                |
| Prednisone use     | -0.051   | 0.871          |          |                |

Dependent variables were input as individual normalized enrichment scores (NES) calculated by ssGSEA. Neutrophil count represents the MCP score on arbitrary units. cSLEDAI, clinical SLEDAI score was calculated by subtraction of the increased-DNA binding and low complement score from the SELENA-SLEDAI score. Hydroxychloroquine, immunosuppressors, and prednisone use were entered as dummy variables coded as 0 when absent or 1 when present. Two-sided *P* values are shown.

**Supplementary Table 9.** Multivariable predictors of module M7.16 activity on SLE patients.

Dependent variable: Module M7.16

| Variable           | Model 1  |                | Model 2  |                |
|--------------------|----------|----------------|----------|----------------|
|                    | Estimate | <i>P</i> value | Estimate | <i>P</i> value |
| Anti-DNase1L3      | 0.717    | 0.002          | 0.754    | <0.001         |
| Anti-DNA           | 0.764    | 0.002          | 0.823    | <0.001         |
| Neutrophil count   | 0.005    | <0.001         | 0.004    | <0.001         |
| cSLEDAI            | 0.026    | 0.509          |          |                |
| Hydroxychloroquine | -0.176   | 0.444          |          |                |
| Immunosuppressors  | 0.246    | 0.231          |          |                |
| Prednisone use     | -0.252   | 0.221          |          |                |

Dependent variables were input as individual normalized enrichment scores (NES) calculated by ssGSEA. Neutrophil count represents the MCP score on arbitrary units. cSLEDAI, clinical SLEDAI score was calculated by subtraction of the increased-DNA binding and low complement score from the SELENA-SLEDAI score. Hydroxychloroquine, immunosuppressors, and prednisone use were entered as dummy variables coded as 0 when absent or 1 when present. Two-sided *P* values are shown.

**Supplementary Table 10.** Multivariable predictors of module M5.15 activity on SLE patients.

Dependent variable: Module M5.15

| Variable           | Model 1  |                | Model 2  |                |
|--------------------|----------|----------------|----------|----------------|
|                    | Estimate | <i>P</i> value | Estimate | <i>P</i> value |
| Anti-DNase1L3      | 0.401    | 0.377          |          |                |
| Anti-DNA           | 0.487    | 0.314          | 1.212    | 0.0103         |
| Neutrophil count   | 0.005    | <0.0001        |          |                |
| cSLEDAI            | 0.205    | 0.0104         |          |                |
| Hydroxychloroquine | -0.764   | 0.10           |          |                |
| Immunosuppressors  | 0.096    | 0.816          |          |                |
| Prednisone use     | 0.9183   | 0.0284         | 1.823    | <0.001         |

Dependent variables were input as individual normalized enrichment scores (NES) calculated by ssGSEA. Neutrophil count represents the MCP score on arbitrary units. cSLEDAI, clinical SLEDAI score was calculated by subtraction of the increased-DNA binding and low complement score from the SELENA-SLEDAI score. Hydroxychloroquine, immunosuppressors, and prednisone use were entered as dummy variables coded as 0 when absent or 1 when present. Two-sided *P* values are shown.

**Supplementary Table 11. SLE patient-derived monoclonal antibodies**

| Clone  | Sorted Population                                                         |
|--------|---------------------------------------------------------------------------|
| 140A10 | 9G4+ SWM (CD27+ IGD-)                                                     |
| 152B5  | 9G4+ SWM (CD27+ IGD-)                                                     |
| 152B8  | 9G4+ SWM (CD27+ IGD-)                                                     |
| 152C1  | 9G4+ SWM (CD27+ IGD-)                                                     |
| 152C12 | 9G4+ SWM (CD27+ IGD-)                                                     |
| 152D1  | 9G4+ SWM (CD27+ IGD-)                                                     |
| 152D2  | 9G4+ SWM (CD27+ IGD-)                                                     |
| 152E10 | 9G4+ SWM (CD27+ IGD-)                                                     |
| 152H5  | 9G4+ SWM (CD27+ IGD-)                                                     |
| 580D7  | 9G4+ SWM (CD27+ IGD-)                                                     |
| 626A10 | 9G4+ SWM (CD27+ IGD-)                                                     |
| 626A11 | 9G4+ SWM (CD27+ IGD-)                                                     |
| 626A3  | 9G4+ SWM (CD27+ IGD-)                                                     |
| 626A4  | 9G4+ SWM (CD27+ IGD-)                                                     |
| 626A5  | 9G4+ SWM (CD27+ IGD-)                                                     |
| 626B11 | 9G4+ SWM (CD27+ IGD-)                                                     |
| 626B2  | 9G4+ SWM (CD27+ IGD-)                                                     |
| 626B5  | 9G4+ SWM (CD27+ IGD-)                                                     |
| 626B6  | 9G4+ SWM (CD27+ IGD-)                                                     |
| 626B9  | 9G4+ SWM (CD27+ IGD-)                                                     |
| 626D7  | 9G4+ SWM (CD27+ IGD-)                                                     |
| 626E3  | 9G4+ SWM (CD27+ IGD-)                                                     |
| 626G12 | 9G4+ SWM (CD27+ IGD-)                                                     |
| 626G4  | 9G4+ SWM (CD27+ IGD-)                                                     |
| 626H2  | 9G4+ SWM (CD27+ IGD-)                                                     |
| 626H4  | 9G4+ SWM (CD27+ IGD-)                                                     |
| 627A11 | 9G4+ SWM (CD27+ IGD-)                                                     |
| 627A7  | 9G4+ SWM (CD27+ IGD-)                                                     |
| 627C12 | 9G4+ SWM (CD27+ IGD-)                                                     |
| 651A6  | 9G4+ SWM (CD27+ IGD-)                                                     |
| 651B12 | 9G4+ SWM (CD27+ IGD-)                                                     |
| 651B2  | 9G4+ SWM (CD27+ IGD-)                                                     |
| 651C4  | 9G4+ SWM (CD27+ IGD-)                                                     |
| 651D12 | 9G4+ SWM (CD27+ IGD-)                                                     |
| 651D5  | 9G4+ SWM (CD27+ IGD-)                                                     |
| 651D8  | 9G4+ SWM (CD27+ IGD-)                                                     |
| 651E12 | 9G4+ SWM (CD27+ IGD-)                                                     |
| 651E7  | 9G4+ SWM (CD27+ IGD-)                                                     |
| 651F5  | 9G4+ SWM (CD27+ IGD-)                                                     |
| 651F6  | 9G4+ SWM (CD27+ IGD-)                                                     |
| 651G2  | 9G4+ SWM (CD27+ IGD-)                                                     |
| 651G6  | 9G4+ SWM (CD27+ IGD-)                                                     |
| 651G9  | 9G4+ SWM (CD27+ IGD-)                                                     |
| 651H3  | 9G4+ SWM (CD27+ IGD-)                                                     |
| 651H7  | 9G4+ SWM (CD27+ IGD-)                                                     |
| 75A11  | 9G4+ SWM (CD27+ IGD-)                                                     |
| 75C5   | 9G4+ SWM (CD27+ IGD-)                                                     |
| 75D9   | 9G4+ SWM (CD27+ IGD-)                                                     |
| 75G12  | 9G4+ SWM (CD27+ IGD-)                                                     |
| 88A1   | 9G4+ SWM (CD27+ IGD-)                                                     |
| 88A10  | 9G4+ SWM (CD27+ IGD-)                                                     |
| 88C1   | 9G4+ SWM (CD27+ IGD-)                                                     |
| 88D1   | 9G4+ SWM (CD27+ IGD-)                                                     |
| 88D3   | 9G4+ SWM (CD27+ IGD-)                                                     |
| 88F7   | 9G4+ SWM (CD27+ IGD-)                                                     |
| 123B5  | 9G4+ ASC(CD27hi CD38hi)                                                   |
| 124A10 | 9G4+ ASC(CD27hi CD38hi)                                                   |
| 629A12 | 9G4+ ASC(CD27hi CD38hi)                                                   |
| 629B11 | 9G4+ ASC(CD27hi CD38hi)                                                   |
| 629D7  | 9G4+ ASC(CD27hi CD38hi)                                                   |
| 629E6  | 9G4+ ASC(CD27hi CD38hi)                                                   |
| 652A11 | 9G4+ ASC(CD27hi CD38hi)                                                   |
| 652C10 | 9G4+ ASC(CD27hi CD38hi)                                                   |
| 652E12 | 9G4+ ASC(CD27hi CD38hi)                                                   |
| 652E8  | 9G4+ ASC(CD27hi CD38hi)                                                   |
| 652F6  | 9G4+ ASC(CD27hi CD38hi)                                                   |
| 652H2  | 9G4+ ASC(CD27hi CD38hi)                                                   |
| 652H8  | 9G4+ ASC(CD27hi CD38hi)                                                   |
| 673G1  | 9G4+ ASC(CD27hi CD38hi)                                                   |
| 673H9  | 9G4+ ASC(CD27hi CD38hi)                                                   |
| 648D5  | 9G4+ acN (CD27- IgD+ CD11c+)                                              |
| 654B11 | 9G4+ DN (CD27- IGD-)                                                      |
| 654D11 | 9G4+ DN (CD27- IGD-)                                                      |
| 654D6  | 9G4+ DN (CD27- IGD-)                                                      |
| 654E10 | 9G4+ DN (CD27- IGD-)                                                      |
| 654E11 | 9G4+ DN (CD27- IGD-)                                                      |
| 654F8  | 9G4+ DN (CD27- IGD-)                                                      |
| 654G4  | 9G4+ DN (CD27- IGD-)                                                      |
| 654H11 | 9G4+ DN (CD27- IGD-)                                                      |
| 654H12 | 9G4+ DN (CD27- IGD-)                                                      |
| 74B12  | 9G4+ Naïve (CD27- IgD+)                                                   |
| 74C3   | 9G4+ Naïve (CD27- IgD+)                                                   |
| 74C11  | 9G4+ Naïve (CD27- IgD+)                                                   |
| 74D12  | 9G4+ Naïve (CD27- IgD+)                                                   |
| 50A4   | 9G4- ASC(CD27hi CD38hi)                                                   |
| 50F2   | 9G4- ASC(CD27hi CD38hi)                                                   |
| 646H5  | 9G4- ASC(CD27hi CD38hi)                                                   |
|        |                                                                           |
|        | SWM, switched memory; ASC, antibody-secreting cells; DN, double negative. |

**Supplementary Table 12.** Ig gene usage, mutation number and CDR3 amino acid sequences of monoclonal antibody C4.

| Clone | Chain | V         | D        | J      | Mutations | Missense mutations | CDR3 sequence    |
|-------|-------|-----------|----------|--------|-----------|--------------------|------------------|
| C4    | Heavy | HV3-49*03 | HD2-2*01 | HJ4*02 | 11        | 4                  | TRNRPGYCSGTSCCLD |
|       | Light | KV2-28*01 |          | KJ4*01 | 7         | 4                  | MQALQIPQT        |

**Supplementary Table 13.** EC<sub>50</sub> of anti-DNase1L3 monoclonal antibodies and their germline variants against DNase1L3, dsDNA, and cardiolipin.

| Antigen     | 75G12          | 75A11          | 627A11        | 88F7         | 75G12/A11 <sub>GL</sub> | 627A11 <sub>GL</sub> | 88F7 <sub>GL</sub> |
|-------------|----------------|----------------|---------------|--------------|-------------------------|----------------------|--------------------|
| DNase1L3    | 13.5 ± 2.90    | 38.5 ± 2.44    | 53.9 ± 12.37  | 247.1 ± 5.52 | 119.6 ± 75.58           | 55.1 ± 33.38         | 23.4 ± 5.52        |
| dsDNA       | 387.2 ± 112.35 | 332.8 ± 159.15 | 43.0 ± 9.25   | 63.0 ± 4.65  | 1031.0 ± 8.49           | 794.0 ± 130.32       | 84.9 ± 4.65        |
| Cardiolipin | 164.2 ± 51.19  | NA             | 270.1 ± 24.89 | 45.7 ± 7.71  | NA                      | NA                   | 339.8 ± 7.71       |

Values are expressed as mean ± standard deviation of the EC<sub>50</sub> in [nM]. Experiments were performed in duplicate.

**Supplementary Table 14.** EC<sub>50</sub> of anti-dsDNA monoclonal antibodies and their germline variants against DNase1L3, dsDNA, and cardiolipin.

| Antigen     | 32.B9       | 33.C9      | 33.H11      | RH14        | 32.B9 <sub>GL</sub> | 33.C9 <sub>GL</sub> | 33.H11/RH14 <sub>GL</sub> |
|-------------|-------------|------------|-------------|-------------|---------------------|---------------------|---------------------------|
| DNase1L3    | NA          | 0.7 ± 0.28 | 0.3 ± 0.3   | 0.4 ± 0.21  | NA                  | NA                  | NA                        |
| dsDNA       | 20.3 ± 6.06 | 16 ± 9.56  | 16.3 ± 6.48 | 22.1 ± 0.17 | 57 ± 12.49          | NA                  | NA                        |
| Cardiolipin | NA          | NA         | NA          | NA          | NA                  | NA                  | NA                        |

Values are expressed as mean ± standard deviation of the EC<sub>50</sub> in [nM]. Experiments were performed in duplicate.

**Supplementary Table 15.** Oligonucleotide sequences

| Name       | Sequence (5' to 3')                 |
|------------|-------------------------------------|
| DNase1L3-F | GAATTCGCCATGAGGATCTGCTCCTTCAA       |
| DNase1L3-R | GCGGCCGCGGTCTAGGAGCGTTTGCTCTTTGTTTT |
| DHApo1     | AGCACTCTCGAGCCTCTCACCGCA            |
| DHApo2     | TGCGGTGAGAGG                        |
